# Supplementary material for: Selection and validation of a set of reliable reference genes for quantitative RT-PCR studies in the brain of the Cephalopod Mollusc Octopus vulgaris
Source: PubMed Central journal article supplement (PMC2722649; doi:10.1186/1471-2199-10-70), 2009-07-14
Supplement: 1471-2199-10-70-S1.pdf [file 1471-2199-10-70-S1.pdf]

## *c*-AMP response element binding protein (CREB)

### alignment

```

A. mellifera : -ME*SMV*EE*NSAVDP--L*SAGS*SGSD-----AAPAIAT*SVQ*SVIQ*EN*QQSVIQTATNI*QPV*ATIS : 56
D. melanogaster : MDN*SIV*EE*EN*NS--S*AASGSND-----VVDVVAQQA*AAAVGGG*-----GGGGG* : 43
L. stagnalis : ---MS*AGN*EPG-----L*ADI*ENG-----TRGI*SV*VH*MSI*EN*-----CAT*OVQ : 34
H. sapiens : ---MT*ME*S*E*EN*QSGDA*AVTE*AE*NQ*MT*VQA*QP*QI*AT*LAQ*VS*MPAA*HAT*SS*APT*V*TL*VQ*LE*NG*-----QT*VQ*VH : 67
O. vulgaris : ---M*SE*VPT*SQ-----T*SEI*ENG-----S*QEI*SV*HVT*IPN*-----QP*VQ*VQ : 34

A. mellifera : KGN*VIL*VSK*PN*SVI*OT*IAQ--AS*LQ*T*LQ*VV*ET*GS*DD*SF*SD*SE*ES*PE*QR*GG*LL*RR*PS*YK*RI*L*N*DL*GG*ENG*RL*PP*LES*SEC : 135
D. melanogaster : GGN*NP*QQ*Q*Q*NP*Q*ST*T*AG--G*PT*GAT*NNA*Q*GG*V*SV*L*T*TAN*CNI*OY*PI*Q*TLA*QH*GL*Q*V*SVI*Q*AN*PS*GI*Q*TAA*GT*QQ* : 122
L. stagnalis : P--VI*QAN--P*TV*I*HS*AG*NY*QT*I*Q*V*RY*AA*VD*--DL*SS*DD*S*DA*K*RR*RE*IL*ARR*PS*YR*RI*L*N*DL*SS--PV*K*MED*DS*NS-- : 104
H. sapiens : G--VI*QAA--Q*PS*VI*Q*SP*Q--V*QT*V*QI*ST*IA*SE*DS*Q*SE*SV*DS*V*TS*QR*RE*IL*S*RR*PS*YR*K*IL*N*DL*SS*DAP*GV*PR*IE*E*E*K*SE* : 144
O. vulgaris : S--VI*QSS*HQ*PS*VI*Q*T*IG--P*N*V*Q*T*I*Q*V*AT*V*ND--DM*T--DGA*EGR*K*RR*RE*IL*ARR*PS*YR*K*IL*N*DL*SS*EC*PP*K*IE*EP*T*N*QD*G : 108

A. mellifera : DSN*VD*SE*VSS--H*SL*HY*Q*T*VI*PA*CT*IQ*ATQ--GEG*V*PG*HT*LT*MS*NA-----ATA*AG*AT*VOY*AQ*G : 192
D. melanogaster : QQALAAAT-----AM*CK*V*VY*VAK*PP*NS*TVI*HT*TP*GN*AV*QI*PE*TF*PK*IK*KE*P*NT*QH*PE*DS*DES*IS*DD*DS*Q : 187
L. stagnalis : ---S*QS*OD*GE*Y*Q*GT*HT*Q*TA*H*G*DA*T*PA*T*Q*GL*Q*TL*MT*NA*S*PT*S*AS*NS*T*GT*TI*VOY*AQ*G : 161
H. sapiens : ETSAPAITTVTVPTPIYQT---SS*G*Y*IA*IT*Q*GS*AI*Q*IAN--G*TD*GV*O*GL*Q*TL*MT*NA-----AA*T*Q*PS*TI*VOY*AQ*T : 213
O. vulgaris : QETTEAASNLS*TNS*I*Q*Y*Q*PAT*VY*SOME*GL*PL*V*PS*E*AI*Q*IT*TH*PE*GT*VAC*Q*GL*Q*TL*MT*NAN*PSS*GAG*TTS*ET*ATI*VOY*AQ*T : 189

A. mellifera : QDT*Q*EF*VE-----GH*GV*V*VE-----DAA*RK*RE*L*RL*L*KN*RQA*ARE*CR*RR*KK : 232
D. melanogaster : HHRSELTRRPS-----Y*NK*IF*TE*IS*CP*DM*SD*NS*GI*AE*DQ*TR*K*RE*I*RL*L*Q*KN*REA*ARE*CR*RR*KK : 244
L. stagnalis : PDGQ*EY*VE-----V*GG*T*N*V*Q*AY*Q*PG*S---LA*Q*V*V*MT--G*SP*IS*SP*QH*MS*E*GS*RK*RE*L*RL*L*KN*REA*ARE*CR*RR*KK : 228
H. sapiens : TDGQ*Q*IL*VE*NS*Q*V*V*QA*AS*GD*V*Q*Y*Q*IR*T*APT*ST*I*AP*GV*V*MA--SS*PA*L*PT*Q*PA*E*AA*RK*RE*V*RL*M*KN*REA*ARE*CR*RR*KK : 291
O. vulgaris : PDGQ*E*LY*VE-----V*GG*T*N*V*Q*AY*Q*ATS---LP*Q*GV*V*MT*GS*PT*IS*PO*LS*E*AA*RK*RE*L*RL*L*KN*REA*ARE*CR*RR*KK : 260

A. mellifera : EYK*CLEN*RV*AV*LEN*R*N*Q*LL*EB*EL*K*SL*K*Q*LD*CE*P*RT*D : 268
D. melanogaster : EYK*CLEN*RV*AV*LEN*Q*N*K*LL*EB*EL*K*SL*K*B*LY*CO*TK*ND : 281
L. stagnalis : EYV*CLEN*RV*AV*LEN*Q*N*K*LL*EB*EL*K*AL*K*B*LY*CO*K*DA : 264
H. sapiens : EYV*CLEN*RV*AV*LEN*Q*N*K*LL*EB*EL*K*AL*K*D*LY*CH*NS*D : 327
O. vulgaris : EYV*CLEN*RV*SV*LEN*Q*N*K*LL*EB*EL*K*AL*K*B*LY*CO*RD*G- : 296

```

### *CREB* identity matrix

|                 | Accession number | A. mellifera | D. melanogaster | L. stagnalis | H. sapiens | O. vulgaris |
|-----------------|------------------|--------------|-----------------|--------------|------------|-------------|
| A. mellifera    | CAD24872         | 100%         |                 |              |            |             |
| D. melanogaster | NP_001097018     | 23%          | 100%            |              |            |             |
| L. stagnalis    | BAC20140         | 35%          | 23%             | 100%         |            |             |
| H. sapiens      | NP_004370        | 33%          | 19%             | 42%          | 100%       |             |
| O. vulgaris     | ACN38053         | 34%          | 21%             | 59%          | 43%        | 100%        |

*O. vulgaris creb* cDNA complete sequence (4313bp)

GCGGCGTTGTGCTGTGACGCTGTAGTTGACGTGGCCACTACGTATTCTGCTAATTTATCCACTCCGATTGCGGCAAAG  
TTGGTGACGAAAAGTACGTTAACTGGTAAGGAAGAACTTTCATCTACATGACCTTTGACGTTATTACTTTTCGATGTTG  
GCCAAGATAACAGGTGAATTGTCCACCAATACATTACGTGTGAAAATTTCTACAAATATATTCTATTGAGTGAAGATG  
CGCATGGGCTCTCAGTTTGTCCCTTTTCTCTGGATACTGTGTGCATCAGTTGGGTCTAATTTTGAACATGGCCTTCTG  
TGCTTATATTTTTCCAGAGTAGAGAATGTCTGAAGTGCCAACTCACAGACCAGTGAGATTGAAAACGGCTCGCAG  
GAGATATCTATTGTGCATGTGACAATACCTAACCAACCAGTCCAAGTGAATCTGTTATACAATCTAGCCATCAACCA  
TCAGTGATACAGACAACCTGGCCCAAATGTTTCAGACTATTCAGGTAGCTACAGTAAATGATGATATGACAGATGGTGC  
TGAAAGGAAGAAAGAGGAGAGAGATATTAGCTAGAAGACCTTCATATCGTAAAATTTGAATGAATFATCGTCCGAGT  
GTCCACCTATCAAAAATTGAGGAACCTACAAATCAAGACGGTCAAGAGACCCTGAAGCAGCTTCAAACTCAGTACA  
AATCCATACAGTACCAGCCTGCAACAGTATACAGCCAGATGGAAGGTTTGCCATTAGTCCCATCTGGTGCCATCCA  
AATAACTACACATCCAGAAGGAACAGTGGCTGGTCAAGGCTTCAAACGTTAAACAATGACCAATGCAAATCCATCAT  
CTGGTGTGGTACAACATCTGGTACTGCCACTATTGTACAGTATGCCAAGGTCCTGATGGACAATTTTTAATTCCTG  
TTACAGTTGGTGGCACAATGTGCAGGCTTACCAGATTGCAACATCTTTGCCCTCAAGGTTGTTATGGCAACCCTG  
GAAGTCCAATTACCAGTCTCAACAATTATCAGAAGAAGCAGCTCGGAAGCGAGAACTTCGTCTATTAACAAAAACAGA  
GAGGCAGCTTCAAGATGTCGACGGAAGAAGAAAAGAAATATGTGAAATGCCTGGAAAATCGAGTATCAGTTCTGGAAA  
ATCAAAAATAAAACATTAATAGAGGAATTGAAGGCATTAAGAAGATTGTATTGTCAAAAAGATGGATAAATGGATTTT  
GGCGATTATGTTCTCCCTAAATATGAAGAGGCAACACAGCAGTTTGTGGTCTCACTCTTGAACAATTTGGAGTTTA  
ACTTTTATTTCAACCAGTTTACTACAAACAATTGCATCTTCAAATCATTTCAAAATAATAAATCAAAATAAAGTTT  
TTGTTTTTTTTTTGTTTTGTTCTGCTTTATTTTCTAAAGTCTAAAATTTTTCTTTCTTTTATTTTTAATAGTTTTCTTT  
GGAAAGTTTTTATTTGAATAATACCGCCCCACTAAATATTTAAAAAAATCATATTTTTAGGCTGACATATTTAAAT  
GACTGTGAAGGGCTGGGTGTGGCAACTTAATGSAATATCATTATTTCTCTGTTGTGGAGATTTTTAATTTCTATAAAA  
TTCAATGGAAATCTTAAATAATTTATCTCTCATCATCTGTTATTTTTATTCCCTTTTGTGCACACCTTTTTGTTTTT  
CCATCTTTTTGATTTTTTAAAAGAAATTTTTGTTAATATTTGAAGAATGATAGAAAATTTGTTTTTAAATFACTTTTTG  
TTGTAATTTGTTTCATTTCTTTGAATATTATTAATAGTCCAATTCAAAAAGAAAAGAATGCTCTTAGGTGGAGGGG  
AAAATGAGGTAGAGTGGTGAGAACAAATTTGGGGTAATATCAGAAAAAAAACAACAAAAAAAACAAAGAAA  
AAGGGAAAAAGACTTTAATAAAACTGGGATGTCTTGCTATGTAATTCATTGGAACTTAACCATAACTATTTTCAA  
CTTTTACAATTCAAATGAAAAGTATCTCATTTTGAACCTGGTGTTCATTACAGTTTAAACAGATTGTTCTGAAACTGAT  
ATGAAATTACTTGGGTGGAAATCTGCAGACCTTTTTACTGCATGCATTTTGTCTGTTTCTATAAAATTTGTTTACATTT  
CAAATAGCTTTTCTTTCTTTACTGTTATTTTTTCTTCTTCATTTAGAAAATTTGATTTTTTCTTGTCAAGTTAC  
TTTTAATTTGTTCTATTTTGGTAAATATAAAGAGGTTAAAAGAAATATACATTAATTTTTCAAATTTCCCATTCATTGTC  
TACATATTAACCTGAAGTTTGTGTTAATAAGCTCTTGTTCAGTACATGGACAACCTGTGACCTTCAGGACTTTCTGAA  
TAGCATGCCAACAAAAAATAACCTTGAATTTCTTTAGTGTGCAGTCCCTTAAAAATGAGCTGTATCTCATGTGCC  
TGCTTCTCAAGAAAGGTTGCCTATGTCTGACCAAGTAACTAACTCATAGTTAGATCTAGCAGATGAAAGTTCTTCTA  
ACTTCATAATAGTCAATGAATTTTTTCAAATTTGGGCAGAAAACCAATTCTGAAGATAAACTATTTTTAACTTTAGGA  
TAATATCAGCTTTAAAATTTTACATTTTGTATATCTTGATGATATTTGATGAATGTTCCATGAGATACTGTTAGCTTT  
TGGGGATCACAGATTTAGCATATCAACAACCTGTTGTAACGTTTCCATCCTAGTTTCTGAGCCCGGAGACAA  
CGCTCGGTTGTTATAGGTTTTAGGGCTATACTGAAGCTGGTCTTGAACAGGCTGTTAATCAATGTTAACTGTACAT  
GAAGTGACTTGTATATAAGCCTGCAAGACAATTACACTAATATTATACTAATGAATGTTAAAAGCAATAAACTTATG  
TGAAACATTACCGTTAATTAATTCACAAACTAAATGAATACAGGTGAATATCCTAAAATCAAATCACACCAAGGTCA  
GTTTTATCTTTCATCTTTTTGGAGTTGATTAATAAAGGATGAGCAGTAGGAATTGACACTGCTCTTCCATTCTTTCA  
AGAACTGGTTGTGCTGTGCTGTGAGAAGGACATGGGAGATCACTTCCACTGTACCTTCTTTCAGTTTATCATAGAGA  
AAGAGTGTGGTTACCACAGCTCTGGTGAATAATGGCATATGATGATGGCTAGAATCCTAAAATAAGATTTGTATGTGT  
CATCTAATTTTCATGCCAGCTTAGAAAAAAAAGGCATCAAATGATGATCATAATAAATAGTTTATTGGTTGAGCAAAA  
TGTTTGTCTTACATTATTAGGTCATGAATAACATGGACTGAAGTATTTAATAAACTTATTCACACCACTTCCATTCA  
TTCATATACAGCATTTAAAAAAAATTCAGGTATGATTTGAGTTTGTGGCTTTTATGTGTTTCAGAACCTGATCA  
AGACCAATTGAATATTTACTATCACGGCTTTTGCCATAAAATGATCACTGTATCCCTGGAATTAATTGTATAGTGCTTT  
TTTTTATGTGTTGGCTACTATGAGAATATGGTAATACTACTACTACTACTAAATAAATTTGTCTAATCCCAT  
TGTAATCATGACTTTACATTATCTTCTTGTATTGTTTTTAAATACCTTTAGTAGATGTTTTGTGCTACTAATGGAT  
GGATGACCCAGTTACTCATTGTTTTTCAACTTCATGTTTTTACTATAACATGATATTTTCTGGGGTTTCCCTCA  
ACTTTATTTGTTGGTATTCATAATTTGCATCACTACATTCCTCTGTGTGTATGTGTGTGTGCATGTGTGTTCACTTTTCA  
GTCTTGCTAACAAAGACGTAGAATATACTTCATTGACAAAGAATGAATCTTGACTATFACTTACCAGCTGGCCAGAT  
TTATTTCCAACTTCACTGACTTTATTTTCAAATAATTTCAATTACCTGATTGTATCTTGTGTTGTTTTAGATTTT  
AAATCTCTTGTGGGAGTTTTGTCTAATAATTTGCATAGATAAATCTCAGTTTACATTAGGTTGGGGTGGGGGAGGGA  
CACTTTATGTAGCATATTTCCACTATATTACTGCTTTTTTGTCTAATTGCTTTCAAATTTAAAATATTACACTATTTG  
AAAGACAATGTGTTGAAGTGAATTTTCAATTTTTTCCCTTTCCCTGAGCAAATAAAACAAAAACAACAAAAAAA  
AAAAAAA

# Dopamine transporter (DAT)

## alignment

```

*          20          *          40          *          60          *          80
A. mellifera : GKVVNFTALEFPMAVLLILIRGVTLPQSLEIRYYLN-ENESAIYKAEVWVWDAATQVFEESLGGPFGVLLAYASYNKMHNNVYK : 82
C. elegans   : GKVVNFTALEFPVVLGILIRGVTLPQWQNGIETYYLR-ENEMIKRPSVWQDAATQVFEESLGGPFGVLMAYSSYNDEHNNVYV : 82
D. melanogaster : GKVVNFTALEFPMAVLLILIRGLTLPQSFLSIQYYLT-ENESAIYKAEVWVWDAATQVFEESLGGPFGVLLAYASYNKMHNNVYK : 82
T. castaneum  : ERELLVLTAVVETVQMVVLEFFAFLSDQNGFVTLNQLFTQLDVKNESNFKTTRIIINLSLSSPGLGFCATIAFGPQSTERTPLHF : 83
H. sapiens   : GKVVNFTATMPVAVLLTALLLRGVTLPQAIDGIRAVLS-VDIYRICEASVWVWDAATQVFEESLGGPFGVLLIAPSSYNKERTNNCYR : 82
O. vulgaris  : GKVVNFTALEFPVVLFIILMIRGATLPQALDGIKYVLT-EDSRILAYSEVWVWDAATQVFEESLGGPFGVLLAFASYNNDIHNNVYR : 82

```

```

*          100          *          120          *          140          *          160
A. mellifera : DALIASLINSANSEVAGGVIRSVLGYMARASGKSHQDVATGPGPGLVEIVYPAATATMPGST-EWALIFFMMLLLTLGLDSSFGG : 164
C. elegans   : DALFHSFINCAISFLSGEVIRSVLGYMSCKSGKPIEAVAQEGPGLVGVVYBEALSTMPYAP-EWSVLFFLMLMTLGLDSSFGG : 164
D. melanogaster : DALIASFINSANSEIAGGVIRSVLGYMAHTLGVRIEDVATGPGPGLVGVVYPAATATMEAST-EWALIFFMMLLLTLGLDSSFGG : 164
T. castaneum  : KAITISVTSVLETVLYSIVQNFLLSLCISQQLFDDFFKLEQ---ELEMPEAVFPELHSSREWITMQLSNCYMTGLRSLIVM : 163
H. sapiens   : DAIVTTSINSLSESSGGVVSFPLGYMAQKHVSPHGDVAKDGPGLTETIYBEATATLPLSS-AMAVVFFIMLLTLGLDSSAMGG : 164
O. vulgaris  : DALIASIVNCHMSEFSGGVIRSMVLGYMSQHSNLPISSEVATGPGPGLVGVVYBEATATLPGAT-EWALIFFMMLLLTLGLDSSFGG : 164

```

```

*
A. mellifera : SEAI : 168
C. elegans   : SEAI : 168
D. melanogaster : SEAI : 168
T. castaneum  : MCLN : 167
H. sapiens   : MESHV : 168
O. vulgaris  : SEAI : 168

```

## DAT identity matrix

|                 | Accession number | A. mellifera | C. elegans | D. melanogaster | T. castaneum | H. sapiens | O. vulgaris |
|-----------------|------------------|--------------|------------|-----------------|--------------|------------|-------------|
| A. mellifera    | XP_624619        | 100%         |            |                 |              |            |             |
| C. elegans      | Q03614           | 73%          | 100%       |                 |              |            |             |
| D. melanogaster | AAF76882         | 90%          | 73%        | 100%            |              |            |             |
| T. castaneum    | XP_972640        | 15%          | 17%        | 15%             | 100%         |            |             |
| H. sapiens      | Q01959           | 61%          | 60%        | 60%             | 21%          | 100%       |             |
| O. vulgaris     | ACN38051         | 76%          | 73%        | 75%             | 18%          | 63%        | 100%        |

## O. vulgaris dat cDNA partial sequence (506bp)

```

CTGGGAAGGTTGTGTGTTTACTGCCTTATCCCATACGTTGTCTGTTTCATTCTTATGATTCTGGGGCAACACTGCCGGGGGCC
TAGACGGCATCAAATATTATCTGACACCAGACTTCTCAAGACTTGATATTCGAGGTGTGGGTGGATCGCGGCACACAAGTCTTC
TTTTCCCTGGACCAGGATCGGTGTTTTATTGCCATTGCAAGTTATAATGATATTCATAAATGTTTATCGAGACGCCACTACT
ACCAGTATCGTTAACTGTATGACGAGTTTTTCTCTGGATTGTTATCTTCATGGTTTTGGGTATATGTCAACAACACTCAAATCTAC
CCATTTACAGAGGTGGCTACACAAGGACCTGGTTTAGTGTTGTTATATCCAGAAGCCATAGCTACCCTCCCAGGTGCAACATT
TGGGCATTGATATCTTCTCATGTTGCTTACCCTAGGTCTAGACAGTTCGTTTGGTGGCTCAGAAGCCATC

```

# Forkhead Box - P family - protein (FOXP)

## alignment

```

*          20          *          40          *          60          *          80
A. mellifera : --NVPKSVAGLNVSRRSDMNGTTPLEDEKPLDVSSNDKVPPLYGHGVCKWPGCEVVICEDDYQAFKHLNTEHTLDDRSTAAQ : 79
C. elegans   : SVMALITHLQHEHPPSDKSNBEEMRNQIEKVESIEHKLSYVERSRLLQCMQHLRMKPSDDTTTFLNFKMBAQSPQRSPIKECA : 81
D. melanogaster : --LMEFDAERFHRSKDNEVCNNDFSYMHD---EFAMRKYYPDLFAHGTCRWPGCEMDLDDITSEVFKHLNTEHGLDDRSTAAQ : 77
S. purpuratus : --MMNGLDGDGSHHPGFLLAHQGMMMPHEDRLANPNN---HPLYAHGMCKWPGCEVVICEDDEPAFLKHLNTEHALDDRSTAAQ : 77
T. castaneum : --LNDGSPGLIGVATNRPSPRD-EAPLEDKLERTTTDDRWHLYGHGVCKWPGCEIICEDDLQAFIKHLNTEHTLDDRSTAAQ : 78
H. sapiens   : SSNTSKASPPITHHHSIVNGQSSVLSARRDSSSHEBTGASHTLYGHGVCKWPGCEVICEDDEPAFLKHLNTEHALDDRSTAAQ : 81
O. vulgaris  : --LLSGGLGGSLLNQSAVSIKQ-----EQEASSPSPDLFRHGVCKWPGCEDTTPNDEPSEFKHLNTEHQLDDRSTAAQ : 70

```

```

*          100         *          120         *          140         *          160
A. mellifera : RVOMQVVSQLEHTQKRE---RDRITAMMHHLHMAK-----QMASPEPECECLSGTTLDR--KLSSEKKQSTENMS : 143
C. elegans   : AFSTIQPAQCEQQQTSTSPQVSPTESEASSLLSAAATVAASTAAAVTSPINQISTVPSVSSMPSPFLNHQLSTSSQPSQQAS : 162
D. melanogaster : RVOMQVVSQLEBSHQKRE---RDRICAMMHHLHYSK-----QLLSETKIDRDKDVPGREG--KFCR-SPLTVNSTG : 140
S. purpuratus : RVOMQVVSQLEHTQKRE---RERLAAMMAHLHMKPPID-----SKQETPKSSVQSSPSLSKPVSVVQHTAPSLPMVP : 146
T. castaneum : RVOMQVVSQLEHTQKRE---RDRICAMMHHLHYSK-----QLSSPEPHKDCG--VVTPT--KMAVNTSLSPSBS : 141
H. sapiens   : RVOMQVVSQLEHTQKRE---RERLAAMMHHLHMRP-SE-----PKPSKPLNLVSSVTMSK--NMLETSPQSLPQTP : 147
O. vulgaris  : RVOMQVVSQLEHTQIRE---KDLICAMMOHLHMKPQVDKSDIILPVLPKQQHQQQQQQQAALQAAMHMDITSQLPSEPLLS : 148

```

```

*          180         *          200         *          220         *          240
A. mellifera : NMSGMPDIPN-----MPSGSMPTMPTMPS-----MAG--PIRRRISDKSALSAG----- : 185
C. elegans   : GSSGPELLQRA-----ASSASTETSENPD-----SKSFVRRSRISDKTVQPIAT----- : 206
D. melanogaster : -----RPTTRQ-----TNSPSPNLNLMVN-----STNLCSIKKRNHDKNTFSINGGLPYMLERAGL : 190
S. purpuratus : SSTPEVPTTS-----IASA-PYHLTSHH-----VTPGGPIRRRNSEKYGLSIST----- : 189
T. castaneum : ---IGDVT-----AVRSPVLHSEAN-----VAG--PIRRRLNDSKALSAGGLPYMLERAGL : 190
H. sapiens   : -TTPATVTP-----ITQG-PSVITPAS-----VNVGALRRRHSDKKNIPMS----- : 189
O. vulgaris  : NASNVPLTSTPAMSLSPFTTCTSPQMVIESTAHPAHSVQVQSPHQHQQQAASSVSGPIRRRVSDEKCNLPIISAGMQRDMENAF : 229

```

```

*          260         *          280         *          300         *          320
A. mellifera : ---SIQRNREFFYKNADVRRPPFTYASLIROSIIESPDKQLTLNIEYNNWFQNTFFCYFRRNAATWKNAVRHNLSLHKCFMRVE : 262
C. elegans   : ---DLAKNRDFEYRNDVRRPPFTYASLIROAIMESDCKQLTLNIEYNTWETTFAYFRRNAATWKNAVRHNLSLHKCFMRVE : 283
D. melanogaster : DVQQSIQRNREFFYKNADVRRPPFTYASLIROAITIDS PDKQLTLNIEYNNWFQNTFFCYFRRNAATWKNAVRHNLSLHKCFMRVE : 271
S. purpuratus : ---SIHNSDFYKNTDVRPPFTYALIRQGITDAPDRQLTLNIEYNNWFETTFAYFRRNAATWKNAVRHNLSLHKCFMRVE : 266
T. castaneum : DVQQSIQRNREFFYKNADVRRPPFTYASLIROSIIESPDKQLTLNIEYNNWFQNTFFCYFRRNAATWKNAVRHNLSLHKCFMRVE : 271
H. sapiens   : ---SIADNYEYKNDVRRPPFTYALIRQAIMESDCKQLTLNIEYNNWFETTFAYFRRNAATWKNAVRHNLSLHKCFMRVE : 266
O. vulgaris  : S-FVLSIQNRREFFYRNTDVRPPFTYASLIROAITIESPHRQLTLEIYQWENATTFAYFRRNBATWKNAVRHNLSLHKCFMRVE : 309

```

```

*          340         *          360         *          380         *          400
A. mellifera : N-VKGAWTVDEVEFFYKRRPQRACSTTGGVPSKSPPTLTHSPMYGDALNANLQAALGDSNMGFLNNSMCTSTTSPDKEHV : 342
C. elegans   : QNVKGAWTVDDSEFFYKRRPNRAS-----ATRSQPQTPLDDISQQKLFDTALSSEF : 335
D. melanogaster : N-VKGAWTVDEIEFFYKRRPQRT-----AGTGN-----LTGATNSPDTNYF : 312
S. purpuratus : N-VKGAWTVDEIEFFYKRRPQRMGSLNTPPSTPNTPTTPI SKSVDMLEPTEMDPLNLETHMHHPMGSLPLLSDAAAAADHA : 346
T. castaneum : N-VKGAWTVDEVEFFYKRRPQRS-----AGLGD----- : 298
H. sapiens   : N-VKGAWTVDEVEYQKRRSQKTT--GSPTLVKNIPT---SLGYGAALNASLQAALAESLPLLSNPLINNASSGLLQAV : 341
O. vulgaris  : N-VKGAWTVDEVEFFYKRRPQKL-----SGYVFFL : 338

```

```

A. mellifera : LA : 344
C. elegans   : LE : 337
D. melanogaster : VA : 314
S. purpuratus : IQ : 348
T. castaneum : -- : -
H. sapiens   : HE : 343
O. vulgaris  : FA : 340

```

## FOXP identity matrix

|                 | Accession number | A. mellifera | C. elegans | D. melanogaster | S. purpuratus | T. castaneum | H. sapiens | O. vulgaris |
|-----------------|------------------|--------------|------------|-----------------|---------------|--------------|------------|-------------|
| A. mellifera    | XP_391970        | 100%         |            |                 |               |              |            |             |
| C. elegans      | NP_001023148     | 29%          | 100%       |                 |               |              |            |             |
| D. melanogaster | AA51579          | 48%          | 27%        | 100%            |               |              |            |             |
| S. purpuratus   | XP_782985        | 47%          | 29%        | 41%             | 100%          |              |            |             |
| T. castaneum    | XP_969436        | 57%          | 28%        | 59%             | 43%           | 100%         |            |             |
| H. sapiens      | EAL24367         | 50%          | 29%        | 40%             | 50%           | 43%          | 100%       |             |
| O. vulgaris     | ACN38054         | 40%          | 29%        | 42%             | 40%           | 45%          | 39%        | 100%        |

*O. vulgaris FoxP* cDNA partial sequence (1111bp)

TGCAAGTGCCGGGGTGCAGGCTGTTATCAGGTGGTCTTGGTGGTAGTCTATTGAATCAGTCGGCTGTTAGCATTAAAC  
AGGAGCAGGAAGCGTCTAGTCCATCGCACCCACTTTTCCGACATGGTGTGGTAARTGGCCGGGGTGTGATACGCCAA  
ATGAAGACTTTCCTTCCTTCATTAAGCATCTGAACTCTGAGCACCAGTTAGATGACAGAAGTACAGCACAAAGCAAGAG  
TACAAATGCAGGTTGTTAGTCAACTTAAAATACAGCTTATACGGGAAAAAGATCTTCTGCAAGCAATGATGCAGCACT  
TACACATGAAACCTCAAGTAGATAAATCAGATATTATTCTCCAGTACTTCCAAAGCAGCAGCCGCACCAGCAGCAGC  
AGCAGACCCAACAAGCTTTGCAACAGGCCACATGGATATTACATCTCAACTCCCTTCAATTCCTCCATTGTCCAATGC  
TTCAAATGTCCCCCTTTTAACCTCCACACCTGCCATGAGTTATCACCCACTACTACCTGTACATCACCTCAAATGGTCA  
TCTCTACTGCCCATCCTGCACATTCACCTGTCCAGCAGTCACCCAGCACCAACAGCAAGCCTCCAGCAGTGTGGGAC  
CAATCCGTCGACGGGTATCAGACAAGTGCAATCTGCCTATCTCTGCTGGAATGCAGAGAGACATGGAGAACGCATTTC  
TTTCTTTTGTAGAAATCCAGAGAAATCGCGAATTTTACCGAACAACAGACGTCMGACCRCRRTTACRTATGCCTCTCT  
CATTTCGTCAGGCCATCATAGAATCTCCACATCGACAATTAACATTGAGTGAAATCTATCAGTGGTTCGCAAACACATTT  
GCTTATTTCCGGCGGAATGAAGCTACGTGGAAGAATGCCGTGCGCCACAACCTTAGTCTTCAAAAATGTTTTATGCGAG  
TTGAGAATGTTAAGGGGGCTGTATGGACCGTCGACGAGGTAGAGTYYTACAAACGGAGACCACAAAAACTGAGTGGG  
TATGTTTTTTTTTGTGTTGATTGTTGTCATTTTTTTTTTTTACAAAACTTTACGAAAAGCAAAAACCTCACAAAAAAA  
AAAAA

# Tyrosine hydroxylase (TH)

## alignment

|                        |   |                |            |              |             |           |           |        |       |       |      |      |     |      |      |      |      |      |   |    |   |   |   |   |   |   |   |   |   |   |   |   |   |   |   |   |   |   |   |   |   |   |   |   |   |   |   |    |   |   |    |   |    |
|------------------------|---|----------------|------------|--------------|-------------|-----------|-----------|--------|-------|-------|------|------|-----|------|------|------|------|------|---|----|---|---|---|---|---|---|---|---|---|---|---|---|---|---|---|---|---|---|---|---|---|---|---|---|---|---|---|----|---|---|----|---|----|
|                        |   | *              | 20         | *            | 40          | *         | 60        | *      | 80    |       |      |      |     |      |      |      |      |      |   |    |   |   |   |   |   |   |   |   |   |   |   |   |   |   |   |   |   |   |   |   |   |   |   |   |   |   |   |    |   |   |    |   |    |
| <b>A. mellifera</b>    | : | EADKKEYRARRNFI | AEIAFAAYRY | CDATETVVEYTB | ETETETTRVFN | ILVLDLVEK | HACAEYRRN | EKKMQE | KEE   | EPHRI | PQLQ | EDVS | :   | 83   |      |      |      |      |   |    |   |   |   |   |   |   |   |   |   |   |   |   |   |   |   |   |   |   |   |   |   |   |   |   |   |   |   |    |   |   |    |   |    |
| <b>C. elegans</b>      | : | HGDVAYLARRNFI  | INDQALERFK | CDDEITCYVDY  | TEBBHATWK   | KAVYEK    | LGDLHL    | SHHC   | CAVYR | QNLK  | ILQ  | EEK  | VLT | ADRI | PQIR | DVN  | :    | 83   |   |    |   |   |   |   |   |   |   |   |   |   |   |   |   |   |   |   |   |   |   |   |   |   |   |   |   |   |   |    |   |   |    |   |    |
| <b>D. melanogaster</b> | : | EADRVYRQRREI   | AEIAFAAYKY | CDDEITFFLDY  | SDVBVKTR    | SRVFK     | TVDLA     | EAKH   | ACAEY | RAAF  | QK   | LQ   | DE  | QI   | EV   | ETRL | PQLQ | EDVS | : | 83 |   |   |   |   |   |   |   |   |   |   |   |   |   |   |   |   |   |   |   |   |   |   |   |   |   |   |   |    |   |   |    |   |    |
| <b>S. purpuratus</b>   | : | ETDKDYRERR     | QRIADVA    | FAKYKH       | CDDEITFRVEY | TDD       | ED        | RTW    | G     | L     | Y    | R    | Q   | K    | A    | L    | F    | P    | H | A  | C | E | H | I | D | A | N | L | E | K | E | G | L | Y | S | E | S | F | T | P | Q | L | E | D | V | S | : | 83 |   |   |    |   |    |
| <b>T. castaneum</b>    | : | EADKKEYRARRNFI | AEIAFAAYKY | CDDEITFRVEY  | TABE        | IA        | TW        | K      | E     | V     | Y    | T    | T   | L    | K    | G    | L    | Y    | A | T  | H | A | C | G | E | H | L | E | A | B | A | L | L | B | R | F | S | G | Y | R | E | D | N | I | P | Q | L | E  | D | V | S  | : | 83 |
| <b>O. vulgaris</b>     | : | EADKKEYRARRNFI | ADMAFTYR   | HNKS         | IFRVEY      | S         | DE        | E      | K     | T     | W    | K    | H   | V    | N    | I    | K    | N    | L | F  | P | H | A | C | S | K | R | H | F | D | L | E | K | K | G | L | Y | S | E | N | F | I | P | Q | L | E | D | V  | S | : | 83 |   |    |

  

|                        |   |        |        |         |        |        |       |     |     |   |      |    |    |    |      |    |   |   |   |   |   |   |   |   |   |   |   |   |   |   |   |   |   |   |   |   |   |   |   |   |     |   |   |   |   |   |   |   |   |   |   |   |   |   |   |   |   |   |   |   |   |   |   |   |   |   |   |   |     |     |     |
|------------------------|---|--------|--------|---------|--------|--------|-------|-----|-----|---|------|----|----|----|------|----|---|---|---|---|---|---|---|---|---|---|---|---|---|---|---|---|---|---|---|---|---|---|---|---|-----|---|---|---|---|---|---|---|---|---|---|---|---|---|---|---|---|---|---|---|---|---|---|---|---|---|---|---|-----|-----|-----|
|                        |   | *      | 100    | *       | 120    | *      | 140   | *   | 160 |   |      |    |    |    |      |    |   |   |   |   |   |   |   |   |   |   |   |   |   |   |   |   |   |   |   |   |   |   |   |   |     |   |   |   |   |   |   |   |   |   |   |   |   |   |   |   |   |   |   |   |   |   |   |   |   |   |   |   |     |     |     |
| <b>A. mellifera</b>    | : | EELRKN | TGFTLR | PAAGLLT | SRDFLS | SLAFRV | QSTQY | IRH | K   | S | EMHT | PE | PD | CI | HELL | GH | M | P | L | A | D | E | S | E | A | C | F | S | O | E | I | G | L | A | S | L | G | A | S | : | 166 |   |   |   |   |   |   |   |   |   |   |   |   |   |   |   |   |   |   |   |   |   |   |   |   |   |   |   |     |     |     |
| <b>C. elegans</b>      | : | KFLQ   | KKTG   | FLR     | EC     | S      | G     | L   | L   | S | ARDF | L  | A  | S  | L    | A  | F | R | V | Q | T | T | Y | L | R | H | H | K | S | E | M | H | S | P | E | P | D | L | I | H | E   | L | L | G | H | V | M | F | S | D | E | L | L | A | C | M | S | Q | D | I | G | L | A | S | L | G | A | S | :   | 166 |     |
| <b>D. melanogaster</b> | : | EFLR   | KNTG   | FLR     | PA     | A      | G     | L   | L   | T | ARDF | L  | A  | S  | L    | A  | F | R | I | P | O | S | T | Q | Y | R | H | V | N | S | E | M | H | T | P | E | P | D | S | I | H   | E | L | L | G | H | M | P | L | A | D | E | S | E | A | C | F | S | O | E | I | G | L | A | S | L | G | A | S   | :   | 166 |
| <b>S. purpuratus</b>   | : | NELR   | CKTG   | FLR     | PA     | A      | G     | L   | L   | S | ARDF | L  | A  | S  | L    | A  | F | R | V | Q | A | T | Q | Y | V | R | H | S | S | A | E | M | H | T | P | E | P | D | C | H | E   | L | L | G | H | V | M | L | A | D | E | S | E | A | C | F | S | O | E | I | G | L | A | S | L | G | A | S | :   | 166 |     |
| <b>T. castaneum</b>    | : | NELR   | RHTG   | FLR     | PA     | A      | G     | L   | L   | T | ARDF | L  | A  | S  | L    | A  | F | R | I | P | O | S | T | Q | Y | V | R | H | K | N | T | E | M | H | T | P | E | P | D | C | H   | E | L | L | G | H | M | P | L | A | D | E | S | E | A | C | F | S | O | E | I | G | L | A | S | L | G | A | S   | :   | 166 |
| <b>H. sapiens</b>      | : | RFLR   | ERTG   | FLR     | PA     | A      | G     | L   | L   | S | ARDF | L  | A  | S  | L    | A  | F | R | V | Q | C | T | Q | Y | R | H | S | S | E | M | H | S | P | E | P | D | C | H | E | L | L   | G | H | V | M | L | A | D | R | E | S | E | A | C | F | S | O | E | I | G | L | A | S | L | G | A | S | : | 166 |     |     |
| <b>O. vulgaris</b>     | : | NELR   | QQTG   | FLR     | PA     | A      | G     | L   | L   | S | ARDF | L  | A  | S  | L    | A  | F | R | V | Q | C | T | Q | Y | R | H | G | S | K | E | D | H | T | P | E | P | D | C | V | H | E   | L | L | G | H | V | M | L | A | D | E | S | E | A | E | F | S | O | E | I | G | L | A | S | L | G | A | S | :   | 166 |     |

  

|                        |   |    |   |   |   |   |   |   |   |   |   |   |     |     |     |
|------------------------|---|----|---|---|---|---|---|---|---|---|---|---|-----|-----|-----|
|                        |   | *  |   |   |   |   |   |   |   |   |   |   |     |     |     |
| <b>A. mellifera</b>    | : | DE | E | E | K | L | S | T | Y | W | F | : | 179 |     |     |
| <b>C. elegans</b>      | : | DE | H | E | K | L | S | T | V | Y | W | F | :   | 179 |     |
| <b>D. melanogaster</b> | : | DE | E | E | K | L | S | T | V | Y | W | F | :   | 179 |     |
| <b>S. purpuratus</b>   | : | DE | D | E | T | R | L | A | T | L | Y | W | F   | :   | 179 |
| <b>T. castaneum</b>    | : | D  | A | E | E | K | L | S | T | V | Y | W | F   | :   | 179 |
| <b>H. sapiens</b>      | : | DE | E | E | K | L | S | T | Y | W | F | : | 179 |     |     |
| <b>O. vulgaris</b>     | : | DE | E | E | K | F | A | T | L | Y | W | F | :   | 179 |     |

## TH identity matrix

|                        | Accession number | A. mellifera | C. elegans | D. melanogaster | S. purpuratus | T. castaneum | H. sapiens | O. vulgaris |
|------------------------|------------------|--------------|------------|-----------------|---------------|--------------|------------|-------------|
| <b>A. mellifera</b>    | NP_001011633     | 100%         |            |                 |               |              |            |             |
| <b>C. elegans</b>      | AAV58890         | 59%          | 100%       |                 |               |              |            |             |
| <b>D. melanogaster</b> | CAA53802         | 77%          | 55%        | 100%            |               |              |            |             |
| <b>S. purpuratus</b>   | XP_001177854     | 59%          | 52%        | 59%             | 100%          |              |            |             |
| <b>T. castaneum</b>    | NP_001092299     | 79%          | 56%        | 81%             | 61%           | 100%         |            |             |
| <b>H. sapiens</b>      | AAI04968         | 64%          | 57%        | 63%             | 70%           | 63%          | 100%       |             |
| <b>O. vulgaris</b>     | ACN38052         | 62%          | 50%        | 58%             | 71%           | 60%          | 70%        | 100%        |

## O. vulgaris TH cDNA partial sequence (539bp)

TTCCGGACAAAGAATACAGAAGAAGAAGGAAGCTCATTGCAGACATGGCATTACATACAGGCATAACAAGAGTATTCCCAGAGTT  
 GAATATTCCGAAGATGAGATAAAGACTTGGAAACATGTTATGTGAACATAAAAAATCTGTTTCCGACTCACGCCTGCTCAAAGCACC  
 GCCATTTCTTTGATTTACTGGAAAAGAAAGGAATCTACAGTGAAAACCTTTATACACAGCTTGAAGATGTTTCCAATTTCTGAAAACAA  
 CAAACAGGTTTCCAAGTGCAGCCCGGTAGCTGGACTGTTATCAGCACGTGACTTCTTGCCAGCTTAGCATTTCGTGTTTCCAATGTACT  
 CAGTACATACGCCATGGCTCCAAACCGGACCACACACAGAACCTGATTGTGTGCATGAACTGCTAGGACATGTCCCAATGCTGGCAG  
 ATCCTGAATTCGCTGAGTTTTCCTCAAGAACTTGGTTTGGCTTCAATAGGGACCTCCGATGAAGATATTGAAAAGTTTGAACGCTTTAC  
 TGGTTAC

# Ubiquitin/ribosomal protein S27a (UBI)

## alignment

```

*          20          *          40          *          60          *          80
A. mellifera : VKAKIQDKKEGIPPPQQRLLFAGKQLEDGRTLSDYNIQKESTLHLVLRRLRGGAKRKKKKNYSTPKRKHKKKKVKLAVLKFYKV : 83
D. melanogaster : VKAKIQDKKEGIPPPQQRLLFAGKQLEDGRTLSDYNIQKESTLHLVLRRLRGGAKRKKKKNYSTPKRKHKKKKVKLAVLKFYKV : 83
S. purpuratus : VKAKIQDKKEGIPPPQQRLLFAGKQLEDGRTLSDYNIQKESTLHLVLRRLRGGAKRKKKKNYSTPKRKHKKKKVKLAVLKFYKV : 83
T. castaneum : VKAKIQDKKEGIPPPQQRLLFAGKQLEDGRTLSDYNIQKESTLHLVLRRLRGGAKRKKKKNYSTPKRKHKKKKVKLAVLKFYKV : 83
H. sapiens : VKAKIQDKKEGIPPPQQRLLFAGKQLEDGRTLSDYNIQKESTLHLVLRRLRGGAKRKKKKNYSTPKRKHKKKKVKLAVLKFYKV : 83
O. vulgaris : VKAKIQDKKEGIPPPQQRLLFAGKQLEDGRTLSDYNIQKESTLHLVLRRLRGGAKRKKKKNYSTPKRKHKKKKVKLAVLKFYKV : 83

```

```

*          100
A. mellifera : DENGKIHRLRRECEPEECGAGVFMA : 108
D. melanogaster : DENGKIHRLRRECEPEECGAGVFMA : 108
S. purpuratus : DENGKIHRLRRECEPEECGAGVFMA : 108
T. castaneum : DENGKIHRLRRECEPEECGAGVFMA : 108
H. sapiens : DENGKIHRLRRECEPEECGAGVFMA : 108
O. vulgaris : DENGKIHRLRRECEPEECGAGVFMA : 108

```

## UBI identity matrix

|                 | Accession number | A. mellifera | D. melanogaster | S. purpuratus | T. castaneum | H. sapiens | O. vulgaris |
|-----------------|------------------|--------------|-----------------|---------------|--------------|------------|-------------|
| A. mellifera    | XP_397323        | 100%         |                 |               |              |            |             |
| D. melanogaster | NP_476778        | 95%          | 100%            |               |              |            |             |
| S. purpuratus   | XP_784247        | 94%          | 93%             | 100%          |              |            |             |
| T. castaneum    | XP_969023        | 98%          | 97%             | 95%           | 100%         |            |             |
| H. sapiens      | CAA44911         | 90%          | 93%             | 94%           | 91%          | 100%       |             |
| O. vulgaris     | ACN38050         | 93%          | 94%             | 97%           | 94%          | 95%        | 100%        |

## *O. vulgaris ubi* cDNA partial sequence (324bp)

```

TGTC AAGGCAAAGATTCAAGATAAAGGAGGGAATTCCTCAGATCAGCAAAGATTGATCTTTGCTGGTAAGCAGCTTGAGGAT
GGCCGTACTACTGTCAGACTACAATATTTCAAAGGAATCAACCCCTTCATTTGGTCCTCGTCTGCGAGGTGGCGCCAAGAAGCG
CAAGAAGAAGAATTACACCACCTCCCAAAAAGAATAAGCATAAGAAGAAGAAGGTTAAGTTGGCGGTTTTGAAAATATTACAAG
GTTGATGAAAATGGTAAAATCACTCGTTTTCGCTCGTGAGTGTCCCAACGAGGAATGTGGAGCTGGTGTGTTATGGC

```

# 18S ribosomal RNA (18S rRNA)

## alignment

```

A. mellifera : GTTTTCATTAATCAAGAACGAAAGTTAGAGGTTCTGAAGCCGATCAGATACCCCTAGTTCAGACCTAAACGATGCCGAC : 81
C. elegans : GTTTTCATTAATCAAGAACGAAAGTTAGAGGTTCTGAAGCCGATCAGATACCCCTAGTTCAGACCTAAACGATGCCGAC : 81
E. cirrhosa : GTTTTCATTAATCAAGAACGAAAGTTAGAGGTTCTGAAGCCGATCAGATACCCCTAGTTCAGACCTAAACGATGCCGAC : 81
S. purpuratus : GTTTTCATTAATCAAGAACGAAAGTTAGAGGTTCTGAAGCCGATCAGATACCCCTAGTTCAGACCTAAACGATGCCGAC : 81
H. sapiens : GTTTTCATTAATCAAGAACGAAAGTTAGAGGTTCTGAAGCCGATCAGATACCCCTAGTTCAGACCTAAACGATGCCGAC : 81
O. vulgaris : GTTTTCATTAATCAAGAACGAAAGTTAGAGGTTCTGAAGCCGATCAGATACCCCTAGTTCAGACCTAAACGATGCCGAC : 81

A. mellifera : CACCGATCCGCGCAAGTTCCCTCCGATGACTCGCGCGGACGCTCCCGCGCGGAAACCAAAGCTTTTGGTTCCGGGGGAG : 158
C. elegans : TCCCGATCCGCGAGGTTT-----TTGCCCTCCCGAGGAGGATATCC--GGAACCAAAGCTTTTGGTTCCGGGGGAG : 152
E. cirrhosa : TGCCGCTCCGCGCCCTTCGCTTCGATGACCGCGCGGAGGCTCCCGGAAACCAATAGTC---GGTCCGGGGGAG : 157
S. purpuratus : TGACCATCCGCGCGCTTACTCCCATGACCGCGCGGCACTCAAAG--GGAACCAAAGCTTTTGGTTCCGGGGGAG : 157
H. sapiens : CGCCGATCCGCGCGCTTATTCCCATGACCGCGCGGCACTCAAAG--GGAACCAAAGCTTTTGGTTCCGGGGGAG : 158
O. vulgaris : TGCCGCTCCGCGCGCTTCCTTCGATGACCGCGCGGAGGCTCCCGCGGAAACCAATAGTC---GGTCCGGGGGAG : 157

A. mellifera : TATGGTTGCAAAGCTGAAACTTAAAGGAATTGACGGAAGGGCACCACAGGAGTGGAGCCTGCGGCTTAATTTGACCCAAC : 239
C. elegans : TATGGTTGCAAAGCTGAAACTTAAAGGAATTGACGGAAGGGCACCACAGGAGTGGAGCCTGCGGCTTAATTTGACCCAAC : 233
E. cirrhosa : TATGGTTGCAAAGCTGAAACTTAAAGGAATTGACGGAAGGGCACCACAGGAGTGGAGCCTGCGGCTTAATTTGACCCAAC : 238
S. purpuratus : TATGGTTGCAAAGCTGAAACTTAAAGGAATTGACGGAAGGGCACCACAGGAGTGGAGCCTGCGGCTTAATTTGACCCAAC : 237
H. sapiens : TATGGTTGCAAAGCTGAAACTTAAAGGAATTGACGGAAGGGCACCACAGGAGTGGAGCCTGCGGCTTAATTTGACCCAAC : 239
O. vulgaris : TATGGTTGCAAAGCTGAAACTTAAAGGAATTGACGGAAGGGCACCACAGGAGTGGAGCCTGCGGCTTAATTTGACCCAAC : 238

A. mellifera : ACGGGAAACCTCACCAGCCCGGACACCCGAGGATGACAGATCGATAGCTCTTTCTGATTCCGTTGGTGGTGCAT : 320
C. elegans : ACGGGAAACCTCACCAGCCCGGACACCCGAGGATGACAGATCGATAGCTCTTTCTGATTCCGTTGGTGGTGCAT : 314
E. cirrhosa : ACGGGAAACCTCACCAGCCCGGACACCCGAGGATGACAGATCGATAGCTCTTTCTGATTCCGTTGGTGGTGCAT : 319
S. purpuratus : ACGGGAAACCTCACCAGCCCGGACACCCGAGGATGACAGATCGATAGCTCTTTCTGATTCCGTTGGTGGTGCAT : 318
H. sapiens : ACGGGAAACCTCACCAGCCCGGACACCCGAGGATGACAGATCGATAGCTCTTTCTGATTCCGTTGGTGGTGCAT : 320
O. vulgaris : ACGGGAAACCTCACCAGCCCGGACACCCGAGGATGACAGATCGATAGCTCTTTCTGATTCCGTTGGTGGTGCAT : 319

A. mellifera : GGCCGTTCTTAGTGGTGGAGCGATTTGCTGGTTAATCCGATAACGAACGAGACTCTAGCCTGCTAAATAGACGTAAC : 401
C. elegans : GGCCGTTCTTAGTGGTGGAGCGATTTGCTGGTTAATCCGATAACGAACGAGACTCTAGCCTGCTAAATAGTGGCGAA : 395
E. cirrhosa : GGCCGTTCTTAGTGGTGGAGCGATTTGCTGGTTAATCCGATAACGAACGAGACTCTAGCCTGCTAAATAGCGCGTGA : 400
S. purpuratus : GGCCGTTCTTAGTGGTGGAGCGATTTGCTGGTTAATCCGATAACGAACGAGACTCTAGCCTGCTAAATAGTGGCGAA : 399
H. sapiens : GGCCGTTCTTAGTGGTGGAGCGATTTGCTGGTTAATCCGATAACGAACGAGACTCTAGCCTGCTAAATAGTGGCGAA : 401
O. vulgaris : GGCCGTTCTTAGTGGTGGAGCGATTTGCTGGTTAATCCGATAACGAACGAGACTCTAGCCTGCTAAATAGCGCGTGA : 400

A. mellifera : TATGGTATCTCGAAGGCCCTC : 422
C. elegans : TCTTC----- : 400
E. cirrhosa : TTAGTGCTTTCCGGTAGCGT : 421
S. purpuratus : CCCC----- : 403
H. sapiens : CCCCCGA----- : 408
O. vulgaris : TTAGTGCTTTCCGGTAGCGT : 421

```

## 18S rRNA identity matrix

|               | Accession number | A. mellifera | C. elegans | E. cirrhosa | S. purpuratus | H. sapiens | O. vulgaris |
|---------------|------------------|--------------|------------|-------------|---------------|------------|-------------|
| A. mellifera  | AY703484         | 100%         |            |             |               |            |             |
| C. elegans    | EU196001         | 84%          | 100%       |             |               |            |             |
| E. cirrhosa   | AY557467         | 81%          | 77%        | 100%        |               |            |             |
| S. purpuratus | L28055           | 90%          | 85%        | 81%         | 100%          |            |             |
| H. sapiens    | NR_003286        | 90%          | 86%        | 83%         | 92%           | 100%       |             |
| O. vulgaris   | FJ 617439        | 81%          | 76%        | 99%         | 80%           | 83%        | 100%        |

## O. vulgaris 18S rRNA (422bp)

```

CGTTTTCTCGATCAAGAGCGAAAGTCCGAGGTTCTGAAGACGATCAGATACCCCTAGTTCAGACCTAAACGATGCCGAC
TGGCGCTCCGCCGGCGTTCGCTTCGATGACCCGGCGGGGAGCCTGCGCGGAAACCATAGTTCGGTTCCGGGGGGAGTATGGT
TGCAAAACAGAACTTAAAGGAATTGACGGAAGGGCACCACCAGGAGTGGAGCCTGCGGCTTAATTTGACCCAACACGGGA
AAACTCACCAGGTCGGACACCGGTAGGATTGACAGATCGATAGCTCTTTCTCGATTCCGGTGGGTGGTGGTGCATGGCCGTT
TTAGTTGGTGGAGCGATCCGCTCGGTTGATTCCGATAACGAACGAGACTCCGGCCTGCTAACTAGCGCGTGCATTAGTGCTTT
TCCGGTAGCGT

```
